# Supplementary material for: The perfect matching between the low-cost Fe2O3 nanowire anode and the NiO nanoflake cathode significantly enhances the energy density of asymmetric supercapacitors
Source: Royal Society of Chemistry journal article supplement (doi:10.1039/c5ta00328h), 2015-01-01
Supplement: c5ta00328h1.pdf [file c5ta00328h1.pdf]

## Supplementary Information

The Perfect Matching between Low-cost Fe<sub>2</sub>O<sub>3</sub> Nanowires Anode and  
NiO Nanoflakes Cathode Significantly Enhances the Energy Density  
of Asymmetric Supercapacitors

*Qianqiu Tang, Wenqiang Wang, Gengchao Wang\**

Key Laboratory for Ultrafine Materials of Ministry of Education, Shanghai Key Laboratory  
of Advanced Polymeric Materials, School of Materials Science and Engineering, East China  
University of Science and Technology, Shanghai 200237, P.R.China

---

\* Corresponding author. Tel.: +86-21-64253527

E-mail address: gengchaow@ecust.edu.cn

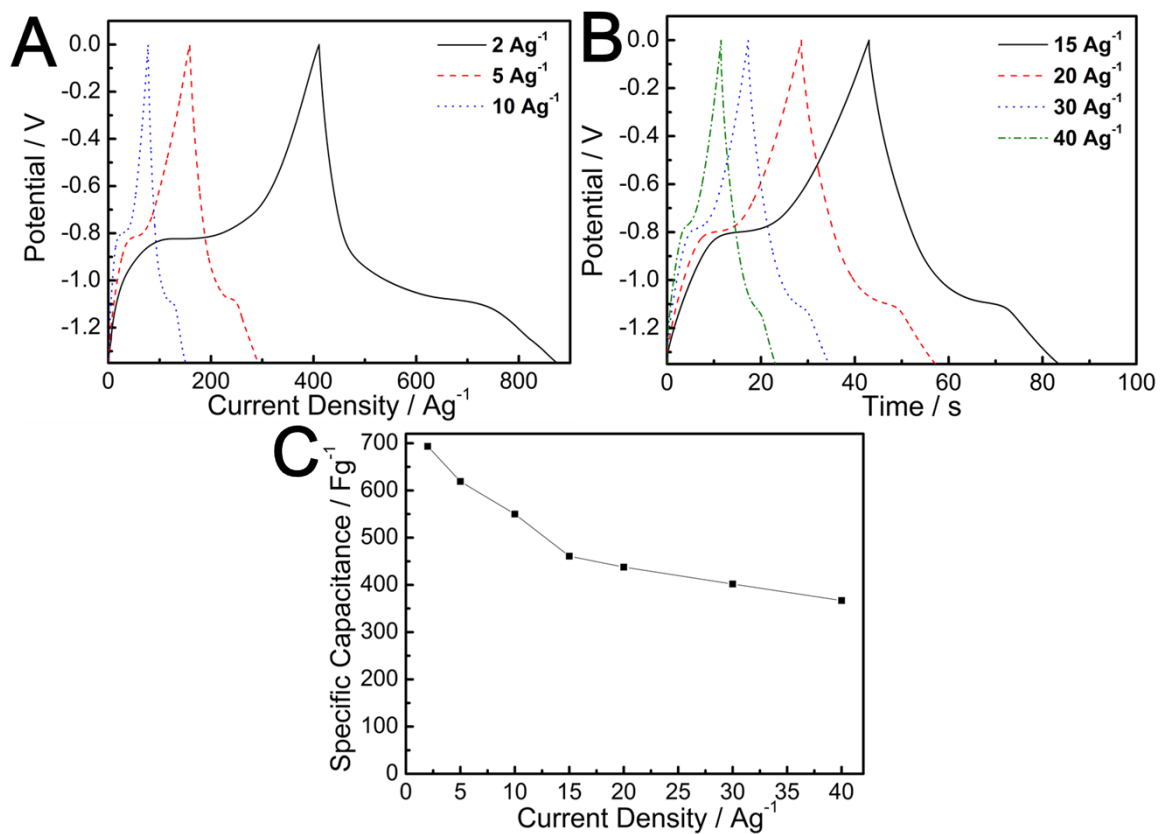

**Fig. S1** Electrochemical performance of Fe<sub>2</sub>O<sub>3</sub> bundles on CFP with three-electrode measurement in 2 M KOH (A, B) galvanostatic charge-discharge curves at various current densities from 5 to 40 Ag<sup>-1</sup>, (C) specific capacitances at various current densities.

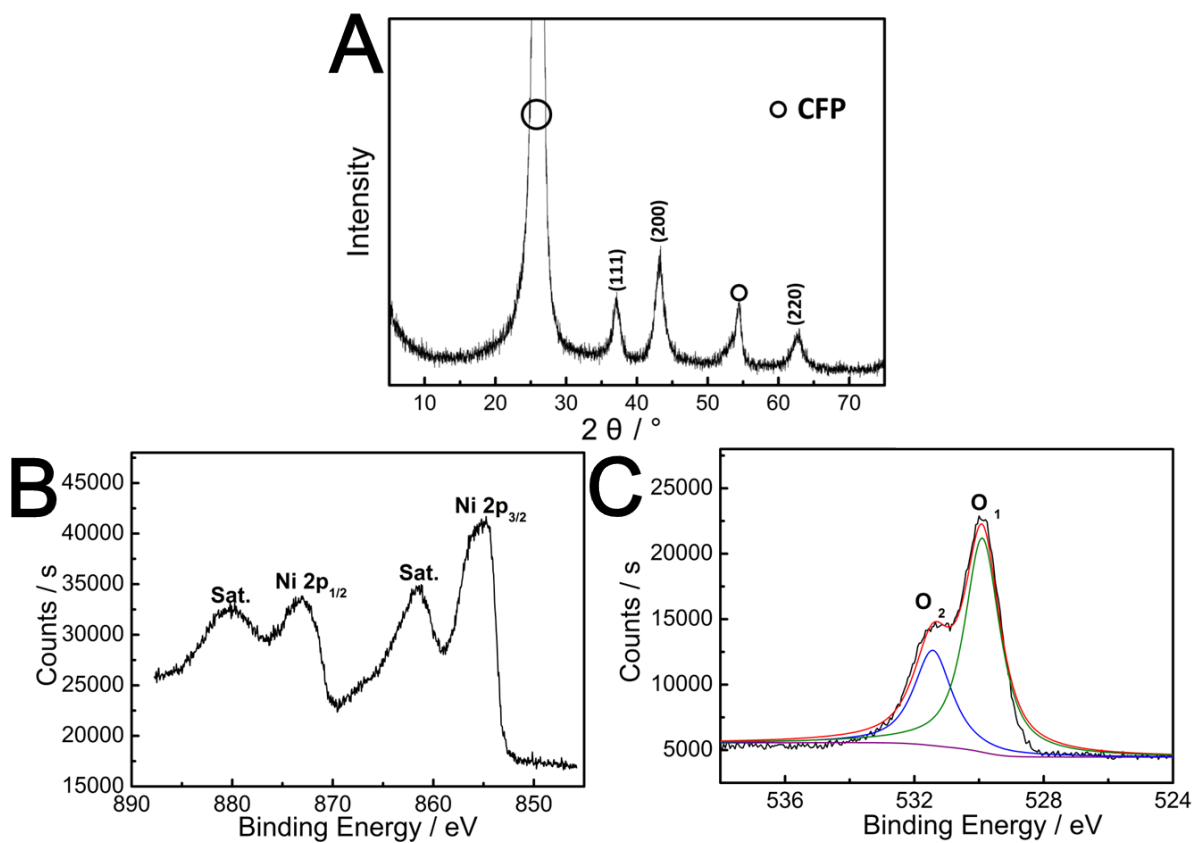

**Fig. S2** (A) XRD pattern of NiO nanoflakes on CFP, (B) Ni2p and (C) O1s XPS spectrum of NiO nanoflakes on CFP.

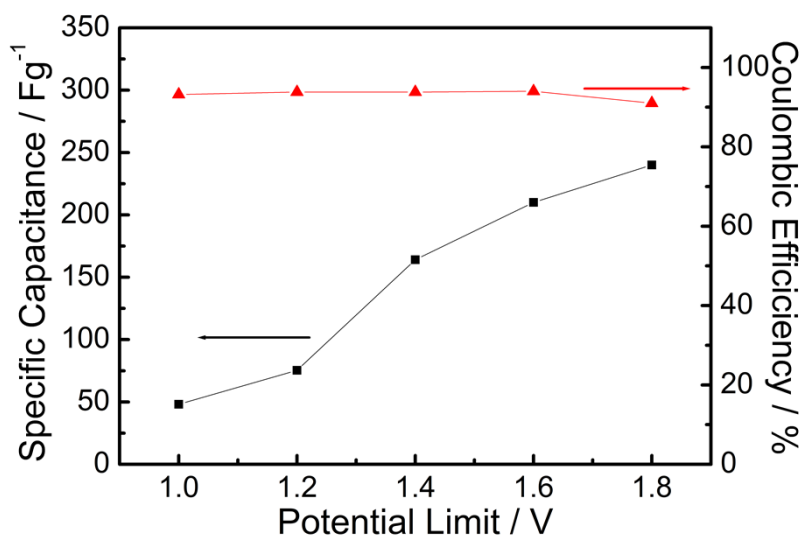

**Fig. S3.** Specific capacitance and coulombic efficiency of the as-assembled NiO nanoflakes//Fe<sub>2</sub>O<sub>3</sub> nanowires AASCs as a function of various potential limit.

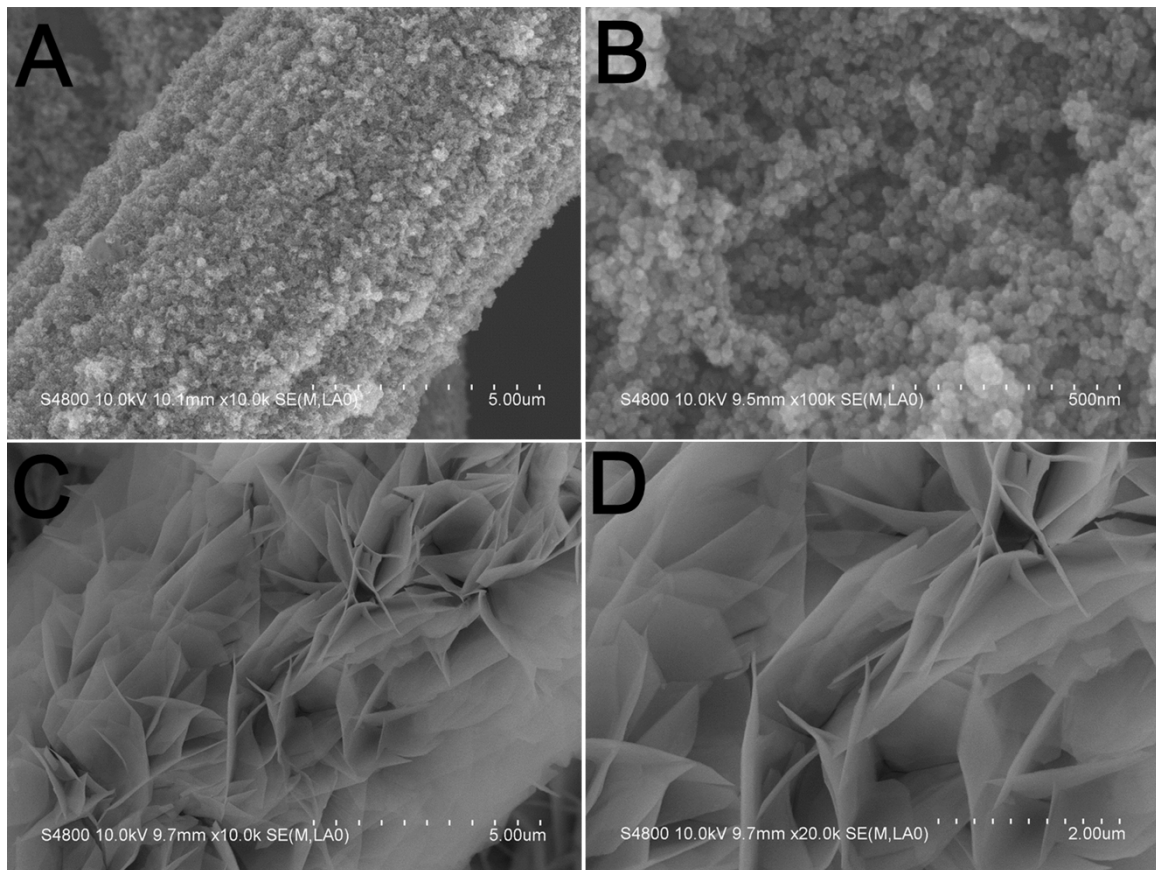

**Fig. S4.** FE-SEM images of (A, B) Fe<sub>2</sub>O<sub>3</sub> on CFP and (C, D) NiO on CFP after 5000 cycles at a current density of 5 A g<sup>-1</sup> (based on the mass of Fe<sub>2</sub>O<sub>3</sub> nanowires on CFP) in the potential window of 0~1.8 V

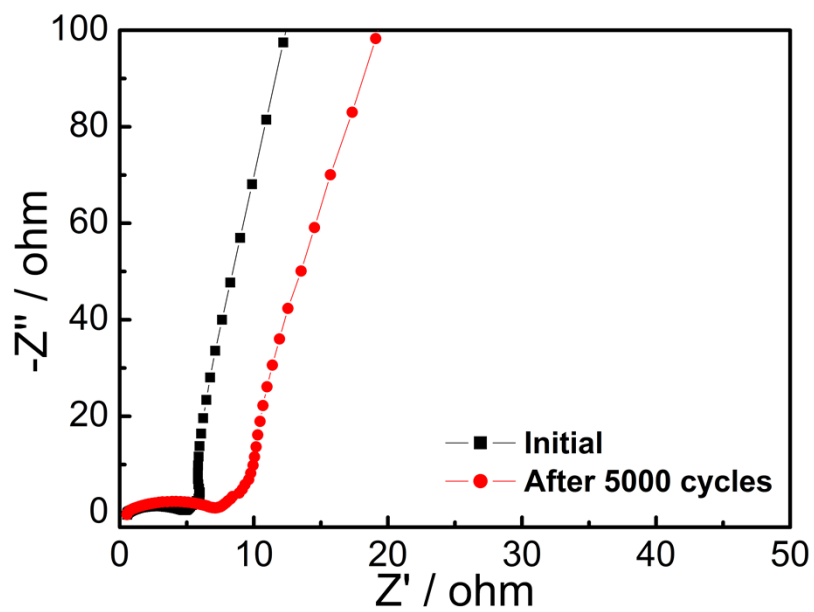

**Fig. S5.** Nyquist plots of the as-assembled NiO nanoflakes//Fe<sub>2</sub>O<sub>3</sub> nanowires AASCs in the frequency range of 100 kHz to 0.01 Hz before and after 5000 cycles.
